# Supplementary material
Source: Royal Society of Chemistry journal article supplement (doi:10.1039/d5cp04916d)
Supplement: d5cp04916d1.pdf [file d5cp04916d1.pdf]

## Supplementary Information

# Computational investigation of BMS-984923 against Alzheimer's Amyloid-beta ( $A\beta$ ) structures : Insights into their molecular interactions and inhibition of aggregation

Smita Patir<sup>a</sup>, and Anupaul Baruah<sup>a,\*</sup>

<sup>a</sup>Department of Chemistry, Dibrugarh University,  
Dibrugarh, Pin-786004, Assam, India

\*Corresponding authors  
E-mail: anupaulbaruah@dibru.ac.in

---

## Table of Contents

Tables S1a, S1b and S1c. Docking tables for the complexes of systems 2, 4 and 6 with cluster ranks 1 to 5.

Tables S2. Docking table for the different snapshots generated from the apo simulation of system 1.

Figure S1. Snapshots generated at different points of time of systems 1 and 2: monomer Fig.2(a-f) and complex Fig.2(g-l).

Figure S2. Snapshots generated at different points of time of systems 3 and 4: monomer Fig.3(a-f) and complex Fig.3(g-l).

Figure S3. Snapshots generated at different points of time of systems 5 and 6: monomer Fig.4(a-f) and complex Fig.4(g-l).

Figure S4. 2D interaction map generated through LigPlot+ software for the system 2 at different time points.

Figure S5. 2D interaction maps generated through LigPlot+ software for the system 2 at different time points.

Figure S6. 2D interaction map generated through LigPlot+ software for the system 4 at different time points.

Table S3. Docking tables for the complex of  $\beta$ -hairpin-BMS-984923 complex

Figure S7. Docked complex and 2D interaction map of the  $\beta$ -hairpin-BMS-984923 complex.

Figure S8. RMSD and RMSF profiles the  $\beta$ -hairpin and  $\beta$ -hairpin-BMS-984923 complex.

Figure S9. Per-residue decomposition energy analysis for the  $\beta$ -hairpin and  $\beta$ -hairpin-BMS-984923 complex.

Table S4. Binding-free energy calculation of  $\beta$ -hairpin-BMS-984923 complex.

---

Table S1a: Docking table for system 2. Cluster rank is the hierarchical ordering of conformational clusters (based on RMSD 2 Å) of generated ligand binding poses, where clusters are ranked according to the lowest binding energy within each cluster, with the top-ranked cluster representing the most energetically favorable binding mode. Docking scores obtained from the AutoDock GA runs. The best ranked energy implies the best ranked conformation with the lowest binding energy and is highlighted as red in colour. MBE indicate the mean binding energy of the cluster. CF refers to the frequency of occurrence of a particular pose or conformation among the GA runs. All energies are in kcal mol<sup>-1</sup>.

| Cluster Rank | Best ranked energy | MBE   | CF |
|--------------|--------------------|-------|----|
| 1            | -5.50              | -5.09 | 10 |
| 2            | -5.48              | -4.84 | 8  |
| 3            | -5.39              | -4.61 | 10 |
| 4            | -5.13              | -4.67 | 7  |
| 5            | -5.12              | -4.67 | 10 |

Table S1b: Docking table for system 4

| Cluster Rank | Best ranked energy | MBE   | CF |
|--------------|--------------------|-------|----|
| 1            | -6.86              | -5.90 | 9  |
| 2            | -6.06              | -5.87 | 4  |
| 3            | -5.95              | -5.58 | 31 |
| 4            | -5.80              | -5.06 | 6  |
| 5            | -5.71              | -5.32 | 6  |

Table S1c: Docking table for system 6

| Cluster Rank | Best ranked energy | MBE   | CF |
|--------------|--------------------|-------|----|
| 1            | -6.58              | -5.80 | 13 |
| 2            | -6.38              | -5.87 | 13 |
| 3            | -6.33              | -5.44 | 6  |
| 4            | -6.10              | -5.34 | 9  |
| 5            | -6.00              | -5.40 | 10 |

---

Table S2: Docking table for the extracted structures from the system 1(monomer) simulation

| Time  | Best ranked energy | MBE   | CF |
|-------|--------------------|-------|----|
| 0ns   | -5.92              | -5.24 | 24 |
| 50ns  | -6.86              | -5.90 | 9  |
| 100ns | -5.84              | -4.87 | 18 |
| 150ns | -6.58              | -5.80 | 13 |
| 200ns | -6.29              | -5.21 | 9  |
| 250ns | -5.64              | -4.97 | 9  |
| 300ns | -6.07              | -5.29 | 12 |
| 350ns | -6.33              | -6.01 | 15 |
| 400ns | -6.00              | -5.63 | 11 |
| 450ns | -6.32              | -5.38 | 21 |
| 500ns | -5.76              | -5.06 | 6  |

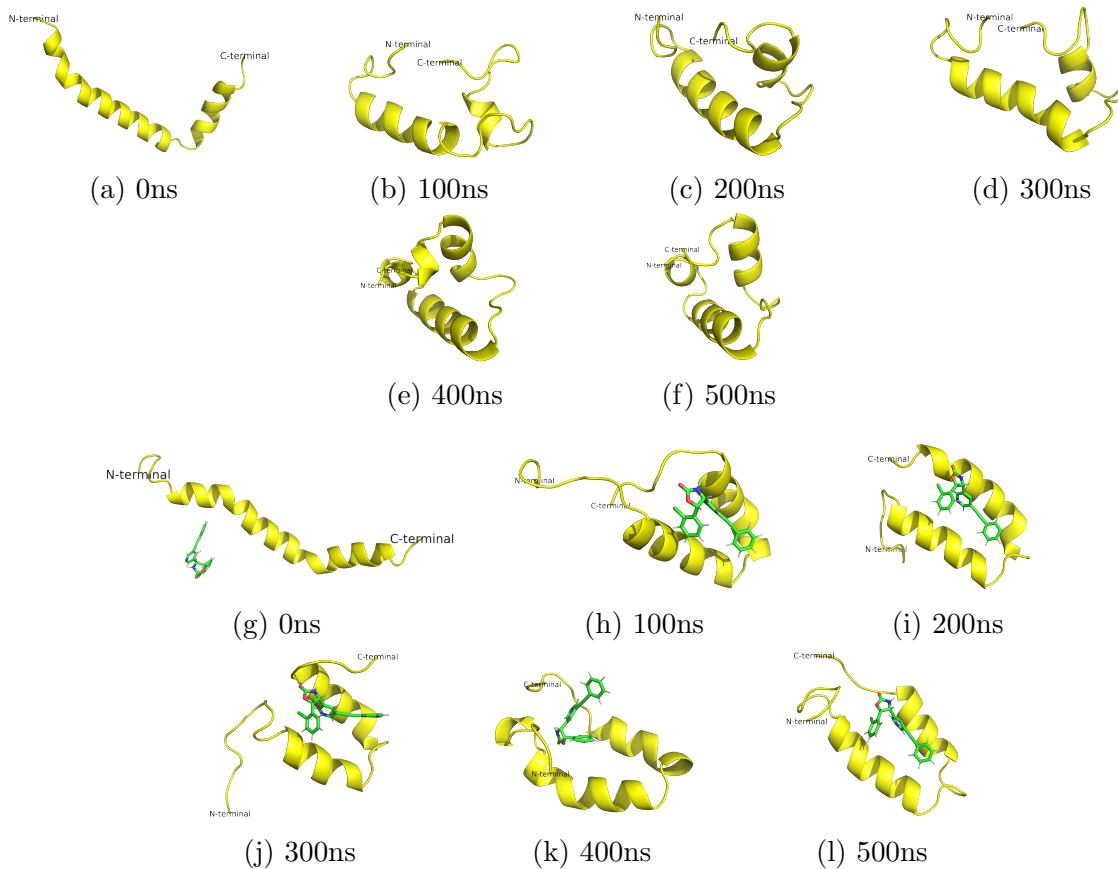

Figure S1: Snapshots generated at different points of time in system 1 and 2: monomer (a-f) and complex (g-l). Images are generated with the help of PyMol visualization software.

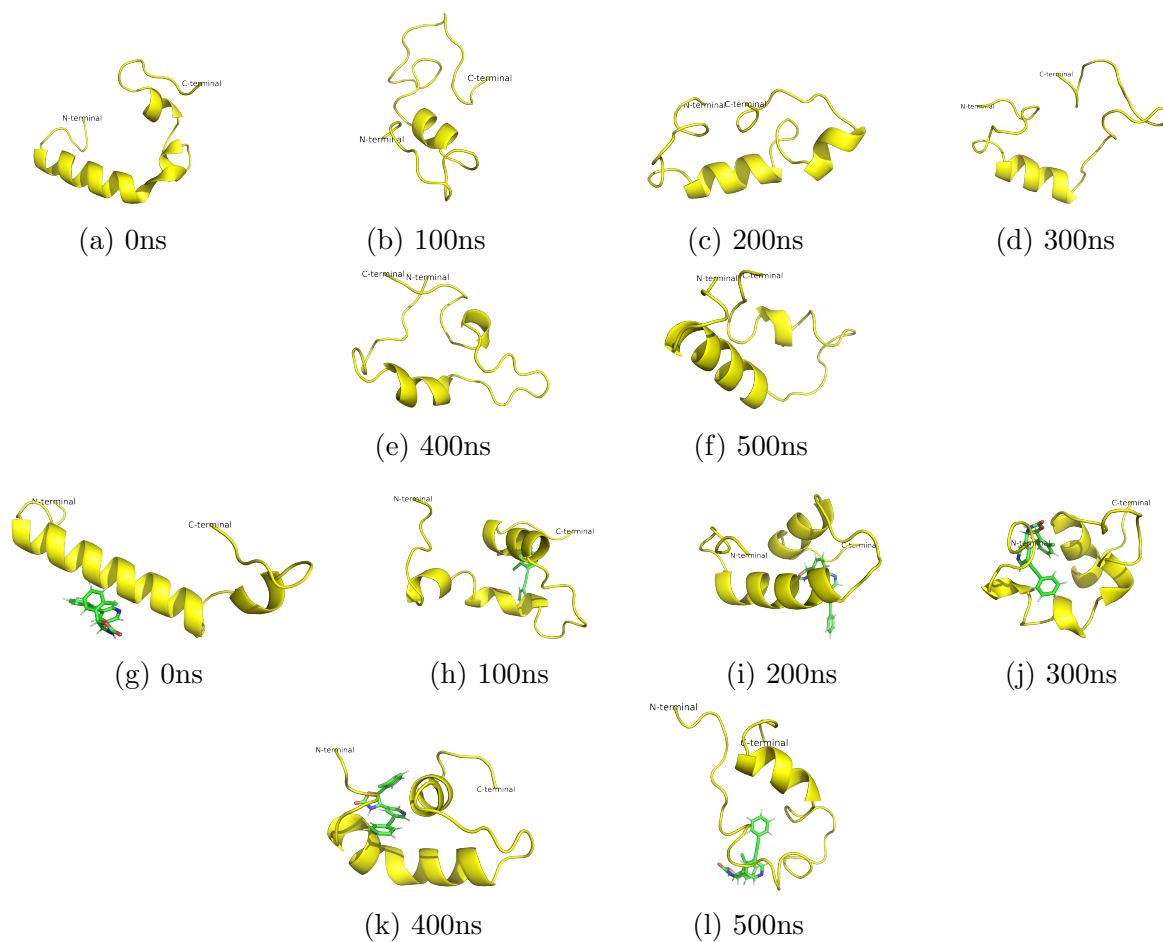

Figure S2: Snapshots generated at different points of time in system 3 and 4: monomer (a-f) and complex (g-l). Images are generated with the help of PyMol visualization software.

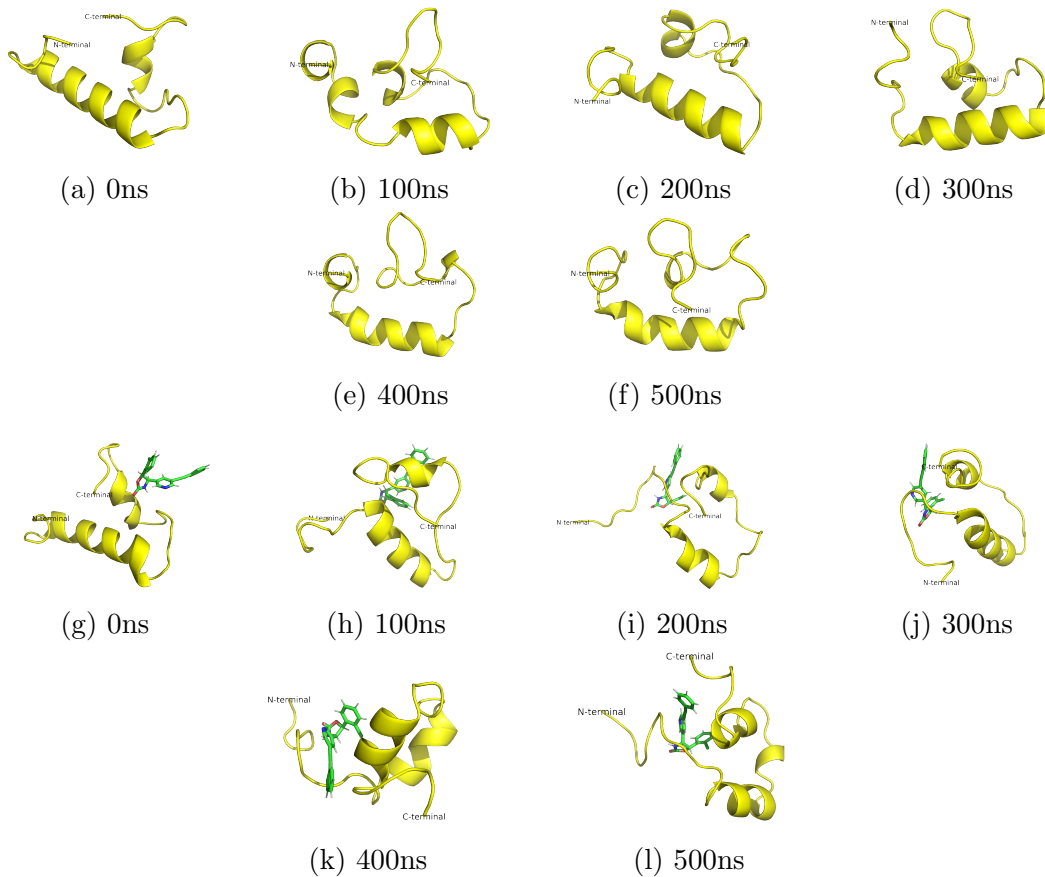

Figure S3: Snapshots generated at different points of time in system 5 and 6: monomer (a-f) and complex (g-l). Images are generated with the help of PyMol visualization software.

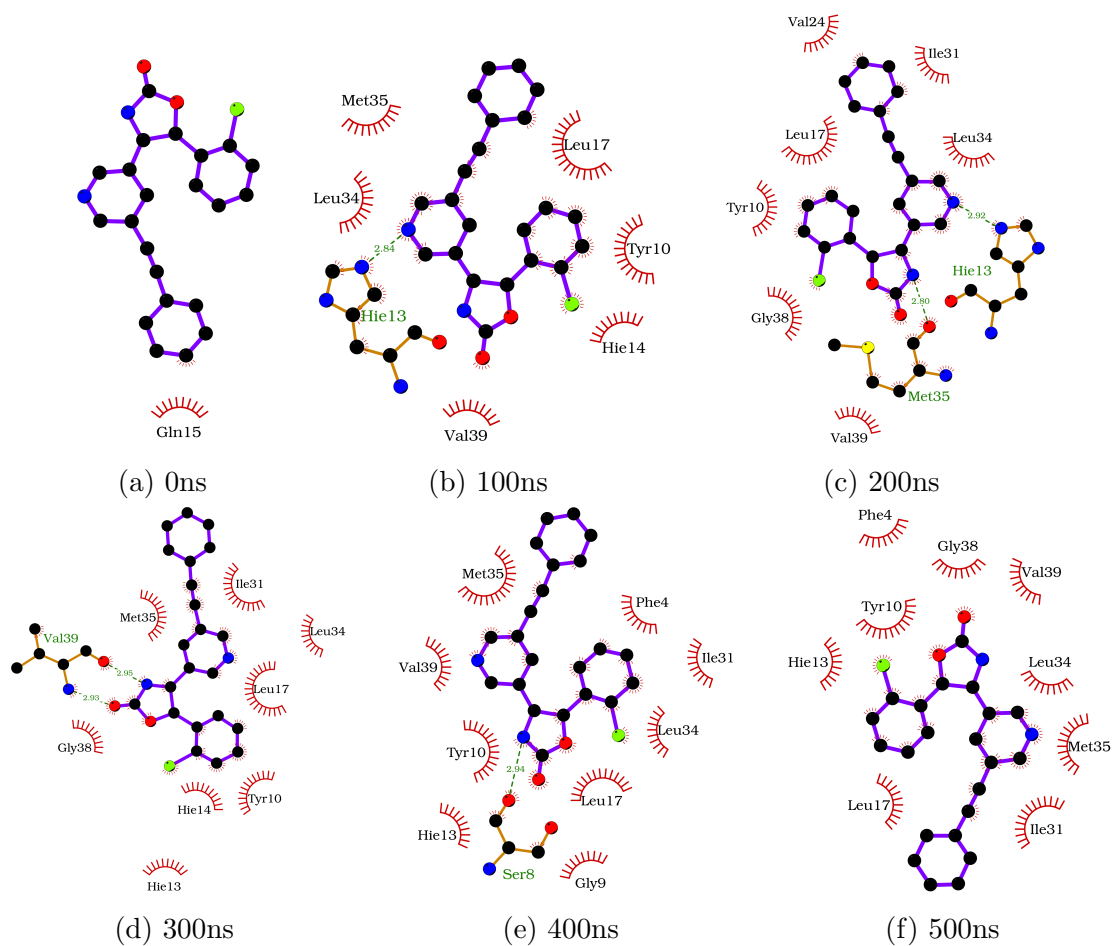

Figure S4: 2D interaction plot in system 2. Images are generated with the help of Ligplot+ visualization software.

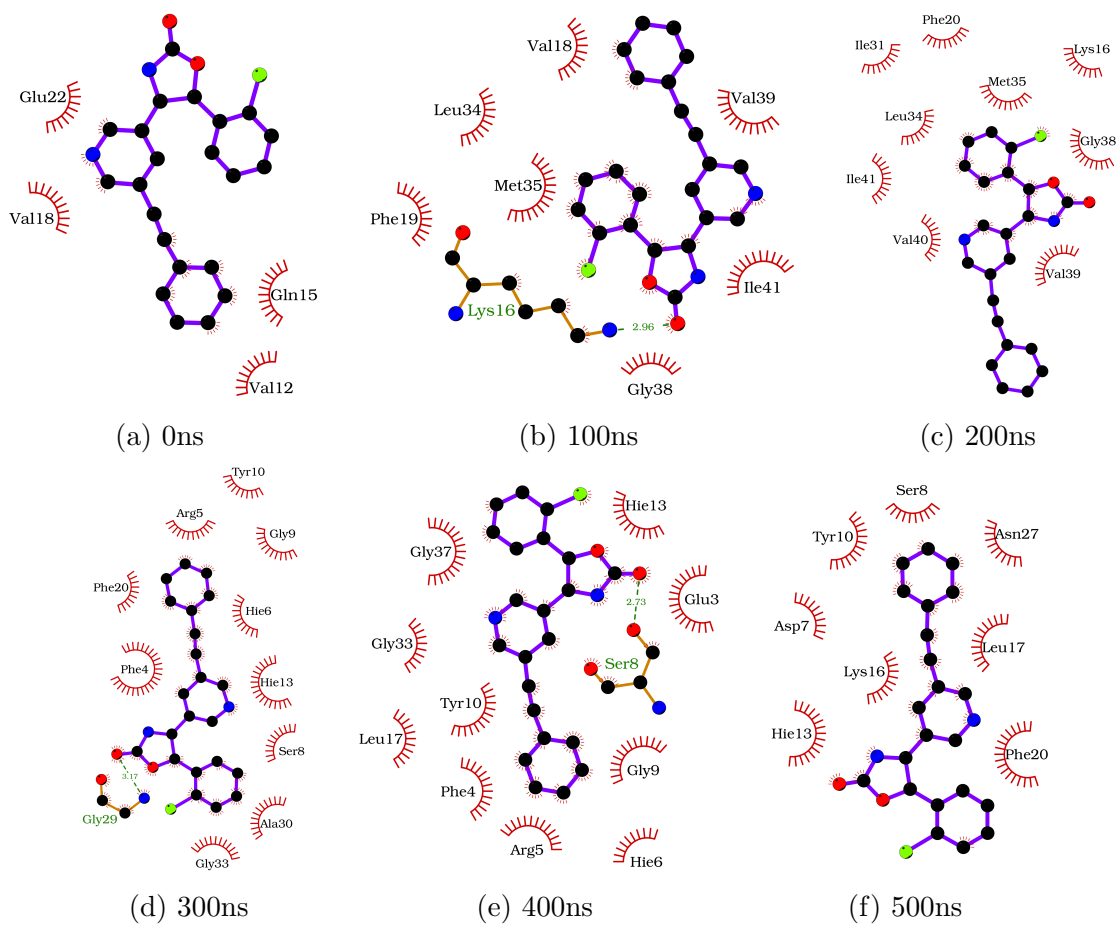

Figure S5: 2D interaction plot in system 4: complex. Images are generated with the help of Ligplot+ visualization software.

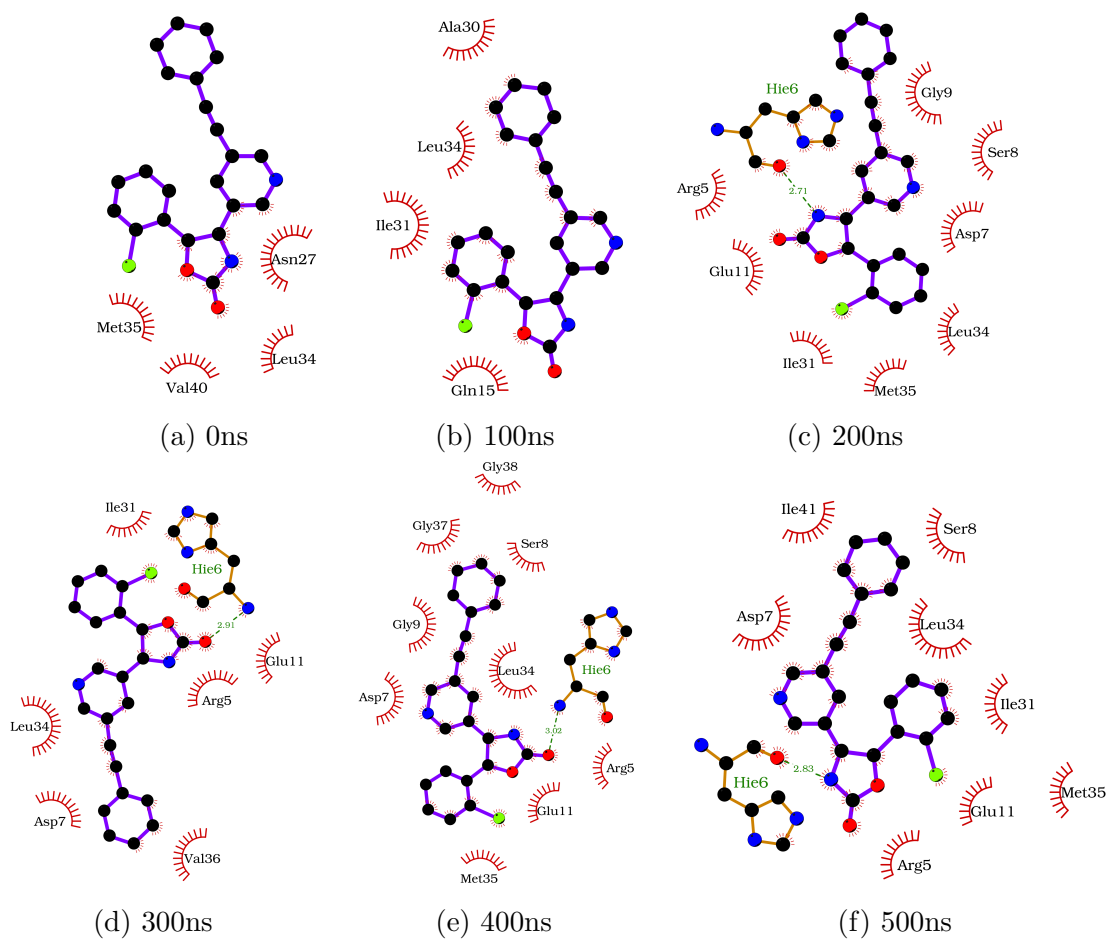

Figure S6: 2D interaction plot in system 6: complex. Images are generated with the help of Ligplot+ visualization software.

---

Table S3: Docking table for  $\beta$ -hairpin-BMS-984923 complex

| Cluster Rank | Best ranked energy | MBE   | CF |
|--------------|--------------------|-------|----|
| 1            | -6.99              | -5.86 | 7  |
| 2            | -6.38              | -6.06 | 4  |
| 3            | -6.27              | -5.79 | 14 |
| 4            | -6.26              | -5.79 | 8  |
| 5            | -6.08              | -5.38 | 8  |

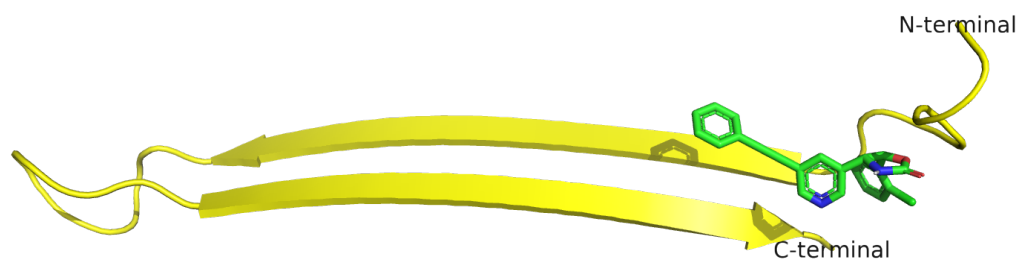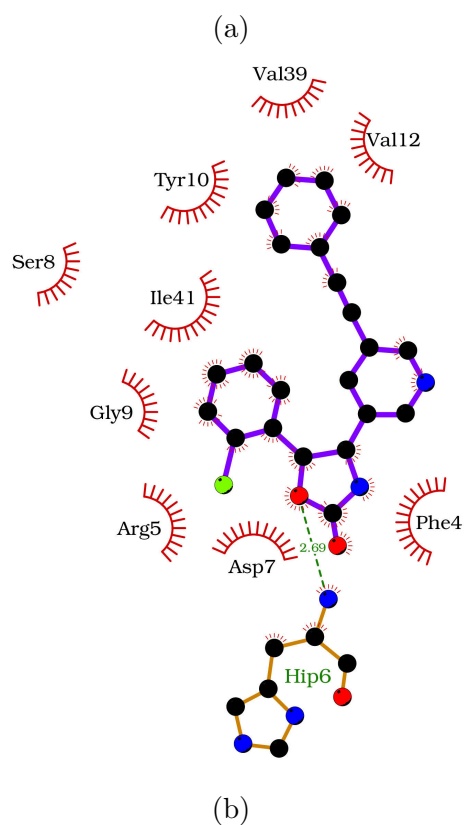

Figure S7: Structures of (a) docked complex of the  $\beta$ -hairpin structure with BMS-984923 and (b) 2D interaction image of the docked complex.

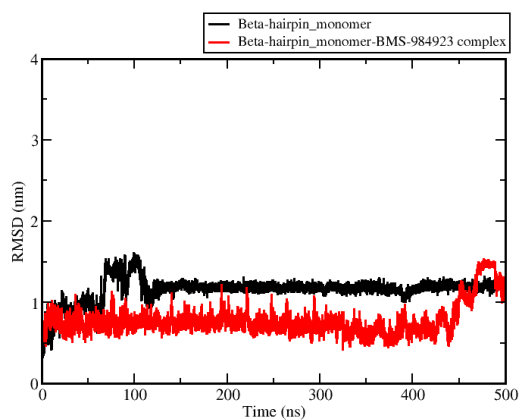

(a) RMSD

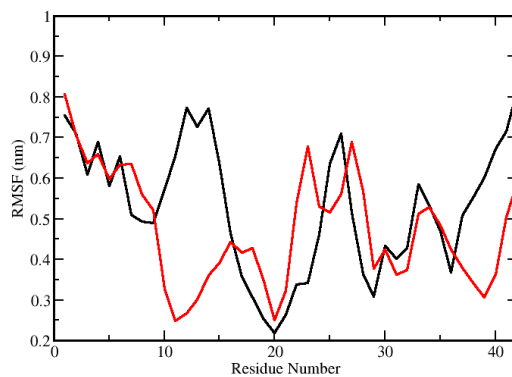

(b) RMSF

Figure S8: (a) RMSD and (b) RMSF profiles of the  $\beta$ -hairpin (black) and  $\beta$ -hairpin-BMS-984923 complex (red) from the 500ns MD simulations.

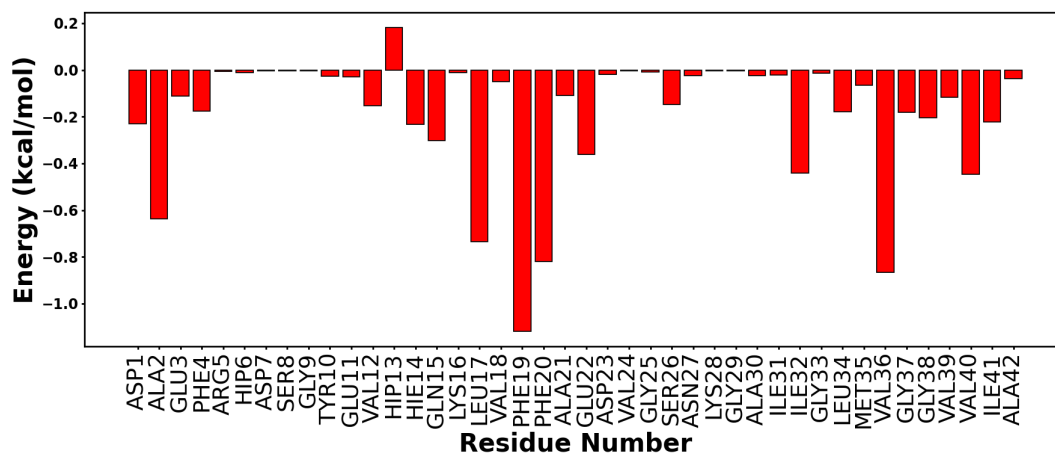

Figure S9: Per-residue binding free energy contribution to MM-PBSA in the  $\beta$ -hairpin-BMS-984923 complex.

---

Table S4: Binding free energy (MM-PBSA) components of the  $\beta$ -hairpin-BMS-984923 complex. All energies are in kcal mol<sup>-1</sup>.

| Energy term                  | Value (kcal mol <sup>-1</sup> ) |
|------------------------------|---------------------------------|
| $\Delta E_{\text{vdW}}$      | $-25.0 \pm 5.0$                 |
| $\Delta E_{\text{Ele}}$      | $-11.0 \pm 6.6$                 |
| $\Delta E_{\text{Polar}}$    | $19.0 \pm 6.0$                  |
| $\Delta E_{\text{Nonpolar}}$ | $-3.0 \pm 0.4$                  |
| $\Delta G_{\text{Binding}}$  | $-20.0 \pm 4.0$                 |
